# Supplementary material for: Polycentricity, Agglomeration, and Industrial Air Pollution in the Chinese City-Regions
Source: Frontiers journal article supplement (doi:10.3389/fenvs.2022.879395), 2022-07-07
Supplement: Table_1.docx [file Table_1.docx]

**APPENDIX:**

**Tab. A1**

**The city-regions and cities[[1]](#footnote-1)[[2]](#footnote-2)**

| Number | Name of city-regions | *Planning document* | Cities |
| --- | --- | --- | --- |
| 1 | Beijing-Tianjin-Hebei | *Regional Planning of Beijing-Tianjin-Hebei Metropolitan Circle, National Main Function Zone Planning* | Beijing, Tianjin, Shijiazhuang, Qinhuangdao, Tangshan, Langfang, Baoding, Cangzhou, Zhangjiakou, Chengde |
| 2 | Yangtze River Delta | *Outline of Regional Planning in the Yangtze River Delta, National Main Function Zone Planning* | Shanghai, Nanjing, Wuxi, Changzhou, Suzhou, Nantong, Yangzhou, Zhenjiang, Taizhou, Hangzhou, Ningbo, Jiaxing, Huzhou, Shaoxing, Zhoushan, Taizhou |
| 3 | Pearl River Delta | *Outline of the Plan for the Reform and Development of the Pearl River Delta region (2008-2020), National Main Function Zone Planning* | Shenzhen, Guangzhou, Zhuhai, Foshan, Jiangmen, Zhaoqing, Huizhou, Dongguan, Zhongshan |
| 4 | Southern Liaoning | *National Main Function Zone Planning* | Shenyang, Dalian, Anshan, Fushun, Benxi, Liaoyang, Dandong, Yingkou, Panjin, Tieling |
| 5 | Shandong Peninsula | *General Plan of Shandong Peninsula City-region (2006-2020), National Main Function Zone Planning* | Jinan, Qingdao, Yantai, Zibo, Weihai, Weifang, Dongying, Rizhao |
| 6 | Harbin-Chang | *National Main Function Zone Planning* | Harbin, Changchun, Daqing, Qiqihar, Mudanjiang, Jilin, Songyuan, Yanbian Korean Autonomous Prefecture |
| 7 | Jianghuai | *National Main Function Zone Planning, Strategic Planning of National Economic Development during the 12th five-year Plan* | Hefei, Wuhu, Maanshan, Tongling, Anqing, Chuzhou, Chizhou, Liu'an, Huainan, Bengbu, Xuancheng, Chaohu |
| 8 | Strait West Coast | *National Main Function Zone Planning, Coordinated Development Planning of City-region in the West Bank of the Straits* | Xiamen, Fuzhou, Putian, Sanming, Quanzhou, Zhangzhou, Nanping, Longyan, Ningde |
| 9 | Central Henan | *Outline of Overall Development Planning for Central Henan City-region、National Main Function Zone Planning* | Zhengzhou, Kaifeng, Luoyang, Pingdingshan, Xinxiang, Jiaozuo, Xuchang, Luohe, Jiyuan |
| 10 | Wuhan | *General Planning of Wuhan Urban Circle* | Wuhan, Huangshi, Ezhou, Xiaogan, Xianning, Huanggang, Tianmen, Xiantao, Qianjiang |
| 11 | Chang- Zhu-Tan | *The Hunan Development Plan of Chang-Zhu-Tan City-region during the 12th five-year Plan* | Changsha, Zhuzhou, Xiangtan, Hengyang, Yueyang, Yiyang, Changde, Loudi |
| 12 | Poyang Lake | *Planning of Poyang Lake Ecological Economic Zone* | Nanchang, Jiujiang, Xinyu, Jian, Yichun, Jingdezhen, Yingtan, Fuzhou, Shangrao |
| 13 | Chengdu-Chongqing | *Regional Planning of Chengdu-Chongqing Economic Zone* | Chongqing, Chengdu, Deyang, Mianyang, Meishan, Ziyang, Suining, Leshan, Yaan, Zigong, Luzhou, Neijiang, Nanchong, Yibin, Dazhou, Guangan |
| 14 | Guanzhong-Tianshui | *Development Planning of Guanzhong-Tianshui Economic Zone* | Xi'an, Tongchuan, Baoji, Xianyang, Weinan, Shangluo, Tianshui, Yang Ling |
| 15 | Taiyuan | *Strategic Planning of National Economic Development during the 12th five-year Plan* | Taiyuan, Jinzhong, Yangquan, Lvliang, Qizhou |
| 16 | Beibu Gulf | *Development Planning of Guangxi Beibu Gulf Economic Zone* | Nanning, Beihai, Qinzhou, Fangchenggang |
| 17 | Lanzhou-Xining | *The 12th five-year Plan of Western Development* | Lanzhou, Xining, Baiyin, Dingxi, Linxia Hui Autonomous Prefecture |
| 18 | Central Yunnan | *National Main Function Zone Planning* | Kunming, Qujing, Yuxi, Chuxiong |
| 19 | Central Guizhou | *National Main Function Zone Planning* | Guiyang, Zunyi, Anshun, Bijie、Qiandongnan prefecture、Qiannan prefecture |
| 20 | Hu-Bao-E-Yu | *National Main Function Zone Planning* | Huhhot, Baotou, Ordos, Yulin |
| 21 | along the Yellow River in Ningxia | *Outline of the 12th Five-Year Plan* | Yinchuan, Shizuishan, Wuzhong, Zhongwei |

1. This paper has dealt with the 24 urban agglomerations identified in the *2013 China Regional Economic Development Repor*t by deleting three urban agglomerations, namely East longHai, Central and South Tibet and Northern Slope of Tianshan. Because the number of cities in these three urban agglomerations is so few and each of them contains only three cities. [↑](#footnote-ref-1)
2. The 21 urban agglomerations contain 173 urban units. But Yanbian Korean Autonomous Prefecture, Linxia Hui Autonomous Prefecture, Chuxiong, Qiandongnan Prefecture, Jiyuan, Tianmen, Xiantao, Qianjiang and Yang Ling do not belong to the prefecture level city, so delete; the data of Bijie, Zhongwei, Chaohu in the sample observation period miss more, so delete. Therefore, the number of prefecture-level city (including municipalities) is 160. [↑](#footnote-ref-2)
